# Supplementary material for: Effects of a High-Concentrate Diet on the Blood Parameters and Liver Transcriptome of Goats
Source: MDPI journal article supplement (doi:10.3390/ani13091559), 2023-05-06
Supplement: s1 [file s1]

Supplementary materials

1. Figures

A

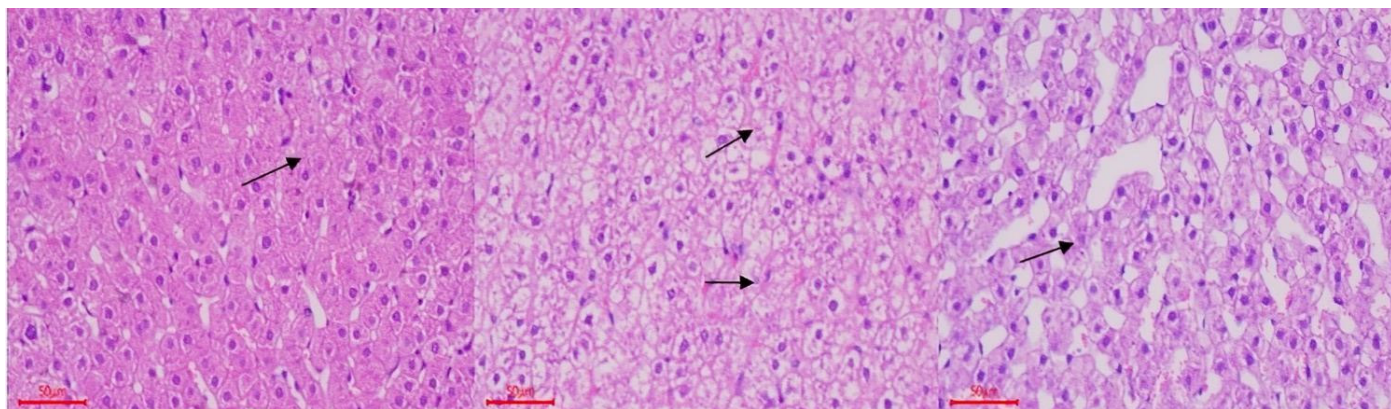

B

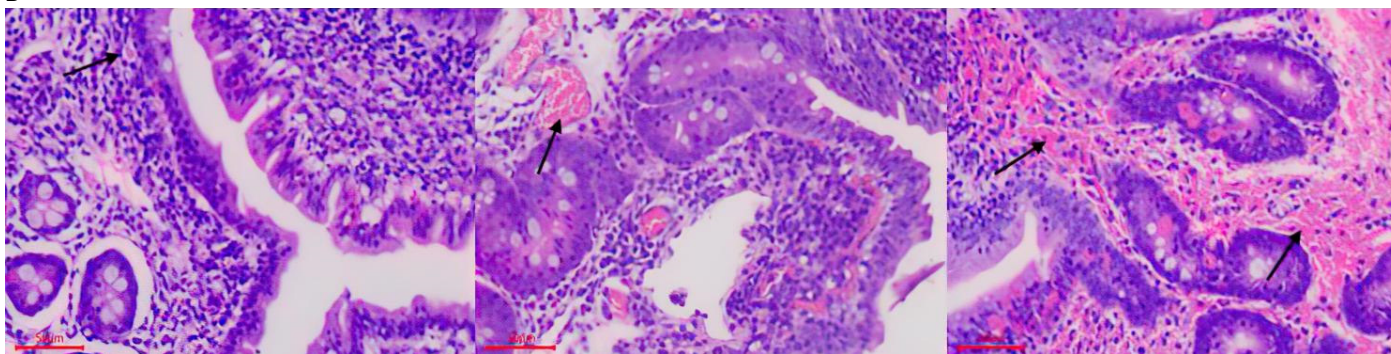

C

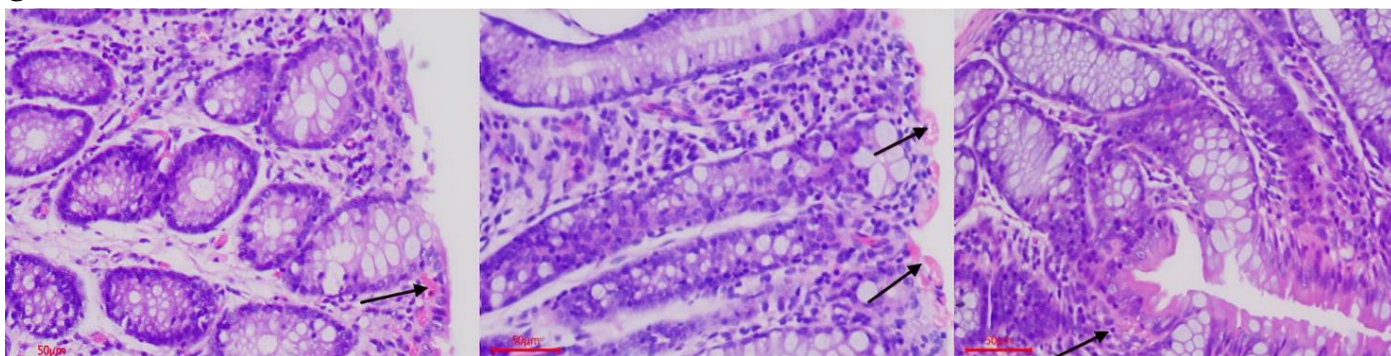

D

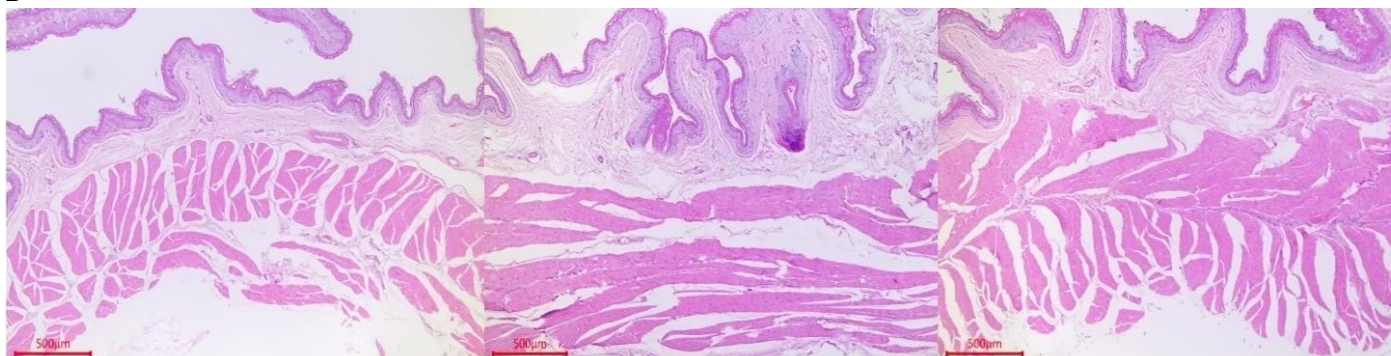

LC

HC

MC

**Figure S1.** Different histopathological sections of goats (Bar=50μm, 200x). (A) Pathological section of liver in goats of different groups; (B) Pathological section of jejunum in goats of different groups; (C) Pathological section of colon in goats of different groups; (D) Pathological section of rumen in goats of different groups. HC = high level of concentrate diet group; MC = medium level of concentrate diet group; LC= low level of concentrate diet group.

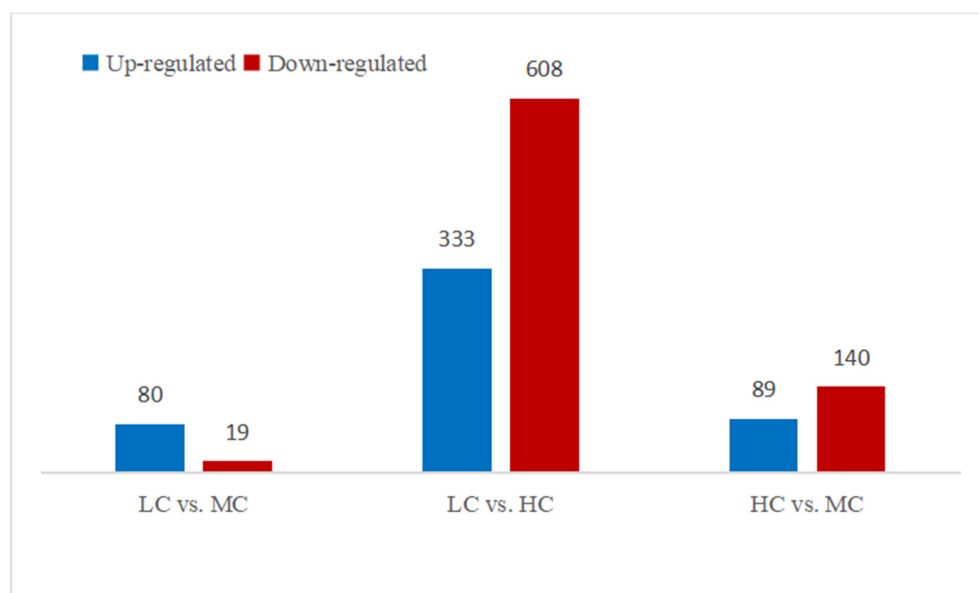

**Figure S2.** Numbers of differential expressed genes between two groups. HC = high level of concentrate diet group; MC = medium level of concentrate diet group; LC = low level of concentrate diet group.

## 2. Tables

**Table S1.** Primer pairs for real-time qPCR.

| Gene name | Accession No.  | Primer sequences (5'-3')                                   | Length |
|-----------|----------------|------------------------------------------------------------|--------|
| β-actin   | NM_001314342.1 | F: TCACGGAGCGTGGCTACAG<br>R: TTGATGTCACGGACGATTTC          | 61bp   |
| EIF4EBP1  | NM_001285589.1 | F:CCGGAGGTACCAGGATCATCT<br>R:CGTCTTGGTCACAGGTGAGTT         | 71bp   |
| ACCS      | XM_018059216.1 | F: TGGCCAGGTTCTGTCTTTCT<br>R: CCACCACATTCTCCGGTTTAAG       | 63bp   |
| OXCT1     | XM_013972785.2 | F: CATTGCCAGTAAGCCGAGAGA<br>R: TGTGATTGCTTCCTCCAAGATAAAA   | 70bp   |
| AACS      | XM_005691340.3 | F: CAGGTGTCTGGGCTCATGGT<br>R: ACGATTCCCCCGGTCTTG           | 58bp   |
| APOA1     | XM_018059749.1 | F: GACCTTGGCTGTGCTCTTCCT<br>R: GGACGACTGTGGCTCATCTTG       | 73bp   |
| APOC3     | XM_005689483.3 | F: CTACTCCTTCTTGCTGCCTTCCT<br>R: CCTCCTCGGCCTTGGTAGTT      | 64bp   |
| APOA5     | XM_018058993.1 | F:CACGGAAAGGCTTCTGGGACT<br>R:CTCAAGTCTGTCTTTCAGGCTCG       | 110bp  |
| HMGCR     | XM_018053703.1 | F: GCACGTCTACAGAAACTGCATATGA<br>R: TGGACTGAAAACGGATGTAAAGG | 64bp   |

**Table S2.** Primer pairs for real-time qPCR.

| <b>Sample<sup>1</sup></b> | <b>Clean Reads No.</b> | <b>Clean Data, bp</b> | <b>Clean Reads Rate, %</b> |
|---------------------------|------------------------|-----------------------|----------------------------|
| LC1                       | 39174282               | 5876142300            | 93.7                       |
| LC2                       | 40019798               | 6002969700            | 94.13                      |
| LC3                       | 40645060               | 6096759000            | 93.69                      |
| LC4                       | 43291734               | 6493760100            | 94.07                      |
| LC5                       | 38813474               | 5822021100            | 93.51                      |
| LC6                       | 42209404               | 6331410600            | 92.95                      |
| MC1                       | 44133074               | 6619961100            | 93.5                       |
| MC2                       | 38732456               | 5809868400            | 93.47                      |
| MC3                       | 40571270               | 6085690500            | 93.93                      |

<sup>1</sup>HC = high level of concentrate diet group; MC = medium level of concentrate diet group; LC = low level of concentrate diet group. Mapped Reads Rate = mapped reads/clean reads. Q30 value = bases of  $\geq 30$ /all bases of sequencing.
